# Supplementary material for: KCu7S4 nanowires and the Mn/KCu7S4 nanostructure for solid-state supercapacitors
Source: Royal Society of Chemistry journal article supplement (doi:10.1039/c3ta12839c), 2013-01-01
Supplement: c3ta12839c.pdf [file c3ta12839c.pdf]

Supporting Information for

# **KCu<sub>7</sub>S<sub>4</sub> Nanowires and Mn/KCu<sub>7</sub>S<sub>4</sub> Nanostructure For Solid-state Supercapitors**

*Shuge Dai, Yi Xi, Chengguo Hu, Jianlin Liu, Kaiyou Zhang, Xule Yue and Lu Cheng*

Department of Applied Physics, Chongqing University, Chongqing, 400044, P.R. China

## **Content:**

The contents of Supporting Information includes the following:

- (1) Electrochemical characterization of Mn/KCu<sub>7</sub>S<sub>4</sub> hybrid ECs.
- (2) SEM image of the cross-sectional view of the Mn/KCu<sub>7</sub>S<sub>4</sub> hybrid ECs after reaction and its mechanism of the ion conduction.
- (3) The screen of three supercapacitor units to light 400 light-emitting diodes (LEDs).
- (4) The calculation method of the specific capacitance, energy density and power density of Mn/KCu<sub>7</sub>S<sub>4</sub> hybrid ECs.
- (5) The CV curves of KCu<sub>7</sub>S<sub>4</sub> nanowires ECs (150 °C) with different potential window and the SEM image of Mn nanoparticle.

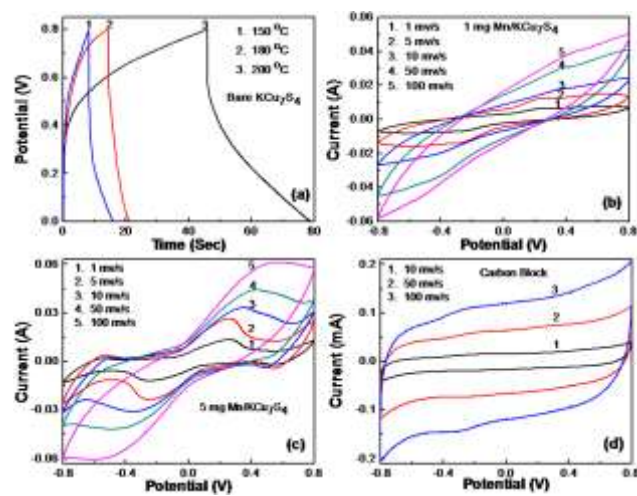

**Fig. S1** (a) Galvanostatic charging/discharging curves for  $\text{KCu}_7\text{S}_4$  hybrid ECs at a fixed current of 5 mA with different synthesis temperature of 150 °C, 180 °C and 200 °C. (b), (c) Cyclic voltammetry(CV) curves for Mn/ $\text{KCu}_7\text{S}_4$  hybrid ECs at different scan rates ranging from 1 to 100  $\text{mV s}^{-1}$  with different Mn nanoparticles coating quality of 1 and 5 mg. (d) Cyclic voltammetry curves for bare carbon hybrid ECs at different scan rates from 10 to 100  $\text{mV s}^{-1}$

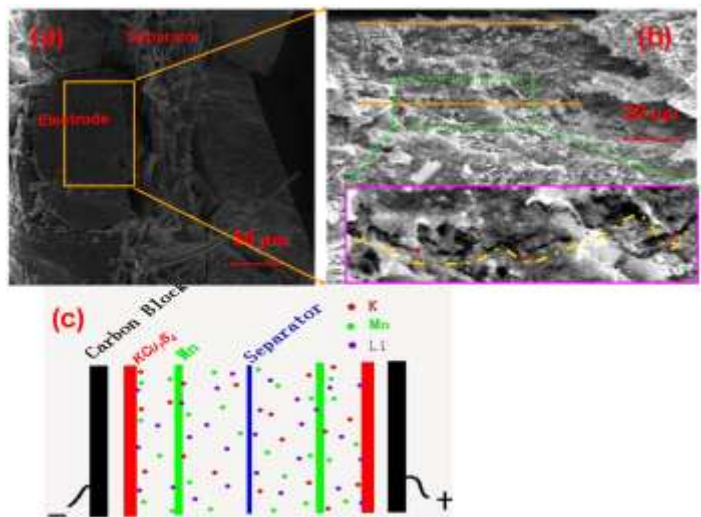

**Fig. S2** SEM image of the cross-sectional view of the Mn/ $\text{KCu}_7\text{S}_4$  hybrid ECs after reaction. The left image (a) shows the sandwich of the Mn/ $\text{KCu}_7\text{S}_4$  hybrid ECs after reaction. The right image (b) shows the high-magnification SEM image of the Mn/ $\text{KCu}_7\text{S}_4$  hybrid ECs of (a). (c) Schematic of mechanism of the Mn/ $\text{KCu}_7\text{S}_4$  hybrid ECs ion conduction.

**Fig. S3** The screen of three supercapacitor units (based on coating 2 mg Mn/KCu<sub>7</sub>S<sub>4</sub> hybrid ECs) in series to light 400 light-emitting diodes (LEDs) well about 2 min.

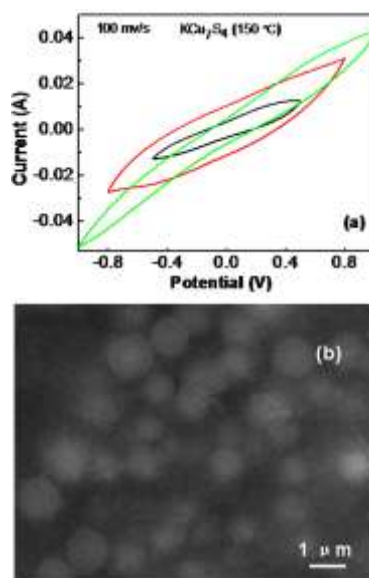

**Fig. S4** (a) The CV curves of KCu<sub>7</sub>S<sub>4</sub> nanowires ECs (150 °C) with different potential window at a scan rate of 100 mV s<sup>-1</sup>. (b) The SEM image of Mn nanoparticle.

The average specific capacitance of Mn/KCu<sub>7</sub>S<sub>4</sub> hybrid ECs can be calculated from the CV curves by integrating the area under the current potential curve,<sup>[1]</sup>

$$C_s = \frac{1}{MV(V_a - V_c)} \int_{V_a}^{V_c} I(v) dv \quad (1)$$

$$\text{and } C_s = \frac{I \Delta t}{M \Delta V} = \frac{I}{M \frac{dv}{dt}} \quad (2)$$

$M$  is the effective mass of Mn/KCu<sub>7</sub>S<sub>4</sub> hybrid ECs in the reaction, which is calculated by 1/5 Mn/KCu<sub>7</sub>S<sub>4</sub> film mass (The weight of KCu<sub>7</sub>S<sub>4</sub> electrode is about 20.03 g (including to Carbon Block (C) and bare KCu<sub>7</sub>S<sub>4</sub>), the weight of the bare KCu<sub>7</sub>S<sub>4</sub> is about 30 mg.  $M$  is Mn/KCu<sub>7</sub>S<sub>4</sub> hybrid ECs of the effective mass in the reaction, which is calculated by 1/5 Mn/KCu<sub>7</sub>S<sub>4</sub> film mass. The reason is as following: the figure S2 shows the cross-sectional view of

the Mn/KCu<sub>7</sub>S<sub>4</sub> hybrid EC after reaction, and the inset in S2 (b) is the corresponding higher resolution SEM image. From the inset image, we can see the reaction of the split, which divide the part of reaction into that of no reaction. (Please see Figure S2). So we can know that only a thin layer of Mn/KCu<sub>7</sub>S<sub>4</sub> hybrid ECs (about 1/5 Mn/KCu<sub>7</sub>S<sub>4</sub> hybrid ECs mass) take a reaction in charge/discharge process. ). Figure S2 shows the cross-sectional view of the Mn/KCu<sub>7</sub>S<sub>4</sub> hybrid EC after reaction. From Figure S2, we can know that only a thin layer of Mn/KCu<sub>7</sub>S<sub>4</sub> hybrid ECs (about 1/5Mn/KCu<sub>7</sub>S<sub>4</sub> hybrid ECs mass) take a reaction in charge/discharge process.  $dv/dt$  is the voltage scan rate. When capacitance  $C$  is a constant, when capacitance  $C$  is a constant, the current  $I$  is proportional to the voltage scan rate  $dv/dt$ .

The energy density is calculated by the function  $E=1/2C_sV_{mas}^2$ , and the power density is calculated by the function  $V_{mas}^2/4MR_s$ .

S2

## Reference

- [1] S. K. Meher, P. Justin and G. Ranga Rao, ACS Appl. Mater. Interfaces, 2011, 3, 2063–2073.
